# Supplementary material
Source: publisher figshare collection journal article supplement (https://geolsoc.figshare.com/ndownloader/files/5425808)
Supplement: Supplementary file 1 [file 5425808]

TABLE 3a Strongoli section plankton
sample	position (m)	dry weight (g)	%>61micron	%	Globigerinoides ruber	G.obliquus	G.sacculifer gr	Zeaglobigerina spp	Neogloboquadrina spp dx	Neogl.spp sx	Globigerina quinqueloba	G.bulloides	G.falconensis	G.foliata	G.glutinata	Globorotalia bononiensis	G.scitula	G.crassaformis sx	Orbulina universa		Warm species: G.ruber+G. obliquus+G. sacculifer gr.+Zeaglobigerina spp+O. universa+G. crassaformis	Cool species: G. quinqueloba+G.falconenis+G. glutinata+N.sp.sx+G. scitula	SST (W/W+C)
ST 46	70	152.4	57.24		5.67	3.99	1.26	40.34	11.76	3.99	1.68	2.73	17.65	0.42	12.18	0	0	0.63	0.42		52.31	35.5	0.6
ST 45	68	198	41.01		4.3	1.27	1.77	37.22	14.43	4.3	2.78	3.8	12.66	0.25	16.46	0	0	0.51	0.25		45.32	36.2	0.56
ST 44	66	168	64.01		12.45	1.72	0	47.64	5.58	4.29	0.86	3	10.3	3	10.73	0	0	0.43	0		62.23	26.18	0.7
ST 41	58	182.4	39.33		3.45	7.33	0.86	31.9	19.4	3.02	3.88	3.45	6.9	2.16	15.52	0	0	0	2.16		45.69	29.31	0.61
ST 30	42	173	32.36		12.66	6.33	0	33.54	14.56	1.9	1.9	1.9	10.13	0.63	10.76	0	0	3.8	0		58.23	24.68	0.7
ST 26	35	211.2	28.35		5.7	2.63	0.88	41.23	18.42	1.75	3.07	3.95	7.46	2.19	10.96	0	0	0	0.88		52.19	23.25	0.69
ST 25	34	190.4	27.52		4.57	6.29	0	33.14	14.86	8	2.86	6.86	6.29	3.43	8	0	0	2.86	1.14		49.71	25.14	0.66
ST 24	32	173.4	52.36		5.62	1.12	0	48.31	7.87	7.87	1.69	1.12	5.62	6.18	10.11	0.56	0	0	0		57.87	25.28	0.7
ST 23	31	218.4	27.12		7.89	3.76	0	27.82	13.91	4.89	8.65	2.63	6.77	10.15	10.9	0	0.38	0	1.88		41.35	31.58	0.57
ST 22	30	265.2	20.48		0.51	4.05	0.25	36.96	17.72	5.57	6.08	1.01	2.78	8.86	13.16	0	0	0	2.28		44.56	27.59	0.62
ST 21	26	397.2	23.24		6.23	5.3	0	29.28	16.82	7.48	6.85	1.87	6.23	4.36	13.4	0.31	0.31	0	0		41.43	34.27	0.55
ST 20	24	258	18.72		6.26	3.13	0.2	29.16	21.92	4.89	5.28	3.72	7.44	7.83	9	0.2	0	0	0.39		39.14	26.61	0.6
ST 19	22	256.6	15.8		7.06	2.75	0	22.75	21.18	6.67	3.53	4.31	12.94	3.14	12.55	0	0.39	0	0		32.55	36.08	0.47
ST 18	20	328.4	16.8		1.66	0.66	0.66	29.57	22.59	8.31	4.65	3.32	10.63	7.97	8.64	0.33	0	0	0.66		33.22	32.23	0.51
ST 17	18	263	17.69		0.94	0.63	0	30.82	21.7	5.35	9.75	4.09	9.12	3.77	10.06	0.31	0.31	0	0.31		32.7	34.59	0.49
ST 16	16	304	18.47		1.86	0.21	0.21	28.78	21.95	5.59	11.8	5.59	0.21	3.93	15.32	0.62	0.21	0	1.66		32.92	33.13	0.5
ST 15	14	255.6	16.63		1.66	0.62	0	30.77	25.57	3.53	8.73	0.62	6.65	6.86	13.1	0.42	0.21	0	0.21		33.26	32.22	0.51
ST 14	12	239.6	26.64		1.93	0	0	46.86	18.36	4.11	5.56	0	7	6.28	9.42	0.24	0	0	0.24		49.03	26.09	0.65
ST 13	10.5	152.4	36.02		7.32	0.56	0	44.51	15.49	4.51	4.51	0	3.94	8.73	10.42	0	0	0	0		52.39	23.38	0.69
ST 12	9.5	214.2	28.6		5.93	0.28	0.28	49.15	13.56	4.8	2.54	0.56	3.39	1.41	17.51	0	0	0	0.56		56.21	28.25	0.67
ST 11	8.5	233	28.07		6.87	0	0	47.53	18.96	2.75	5.22	0.27	4.67	2.47	10.99	0	0	0	0.27		54.67	23.63	0.7
ST 10	7.5	231.2	26.35		10.96	0.53	0.53	48.4	16.84	2.67	3.21	0.8	3.74	4.81	6.95	0	0	0	0.53		60.96	16.58	0.79
ST 9	6.5	267.8	18.93		14.24	0.63	0.95	33.86	13.61	5.7	8.23	0.95	4.43	3.8	12.97	0	0	0	0.63		50.32	31.33	0.62
ST 8	5.5	274.8	22.11		10.44	0.82	0	37.91	13.19	4.95	5.77	0.27	6.59	7.97	11.54	0	0	0	0		49.18	28.85	0.63
ST 7	4.5	245.6	24.51		14.21	2.73	0	36.61	14.21	3.55	9.29	1.37	3.01	3.28	11.48	0	0	0	0.27		53.83	27.32	0.66
ST 6	3.5	297	16.09		8.73	1.13	0	34.37	17.75	3.66	10.42	0.56	2.54	4.51	14.65	0	0	0	0.56		45.63	31.27	0.59
ST 5	2.5	232.4	21.97		9.52	1.83	0.73	35.53	18.32	7.69	8.06	1.1	2.2	3.66	10.99	0	0	0	0		47.62	28.94	0.62
ST 4	1.4	209.4	17.5		8.42	0.99	1.98	39.11	17.82	5.94	6.93	0.74	1.98	3.96	10.4	0	0	0	1.24		51.73	25.25	0.67
ST 3	0.6	315.4	12.19		8.77	0.88	0	38.6	23.1	7.31	8.19	0	1.75	1.46	8.77	0	0	0	0.58		48.83	26.02	0.65
ST 2	0	204.6	13.89		17.65	1.24	1.86	31.89	18.27	4.64	5.57	0.93	4.95	1.86	8.67	0	0.31	0	2.17		54.8	24.15	0.69
ST 1	-1	234.4	25.81		6.8	2.33	0.68	32.46	17.78	7.09	4.66	0.29	9.23	8.94	6.41	0.29	0.1	0	2.43		44.8	27.5	0.62
